# Supplementary material for: Platelet activation and prothrombotic properties in a mouse model of peritoneal sepsis
Source: PubMed Central journal article supplement (PMC6131186; doi:10.1038/s41598-018-31910-8), 2018-09-10
Supplement: 41598_2018_31910_MOESM1_ESM.pdf [file 41598_2018_31910_MOESM1_ESM.pdf]

**PLATELET ACTIVATION AND PROTHROMBOTIC  
PROPERTIES IN A MOUSE MODEL OF  
PERITONEAL SEPSIS**

Fanny Vardon Bounes, Vincent Mémier, Marina Marcaud,  
Aemilia Jacquemin, Hind Hamzeh-Cognasse, Cédric Garcia,  
Jennifer Series, Pierre Sié, Vincent Minville, Marie-Pierre  
Gratacap, Bernard Payrastre

Supplementary Figures

**a**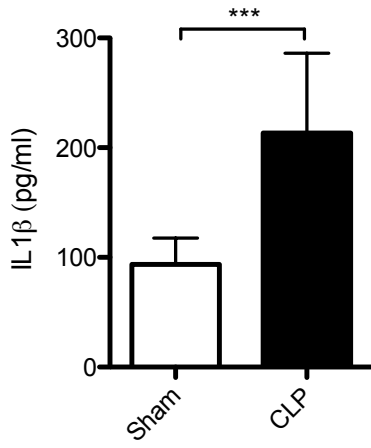**b**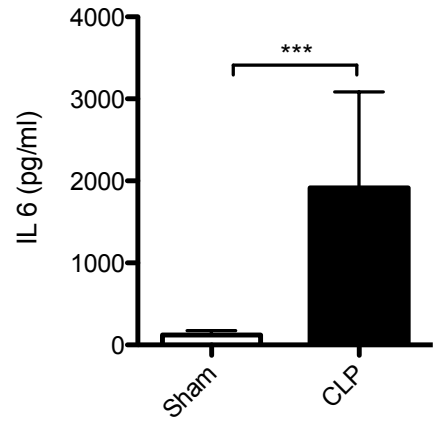**c**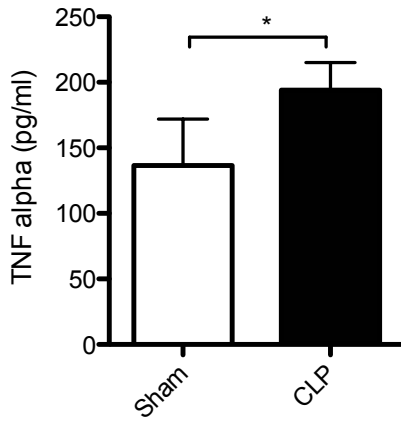**d**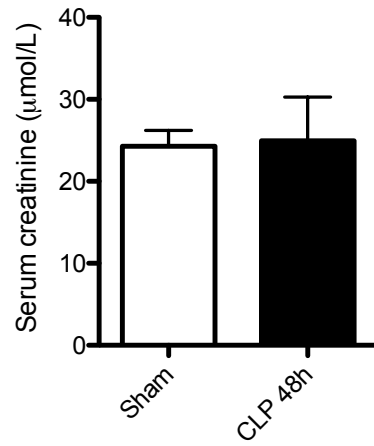

**a**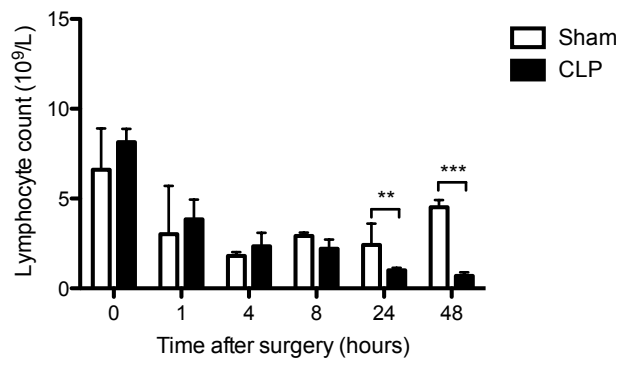**b**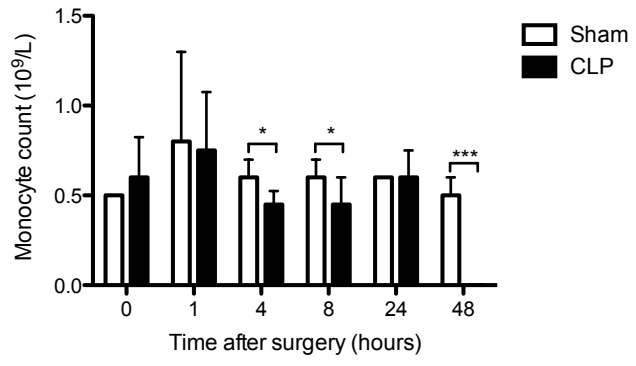**c**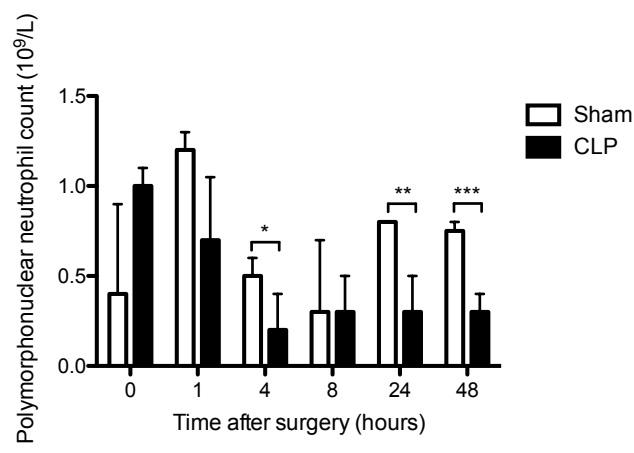

**a**

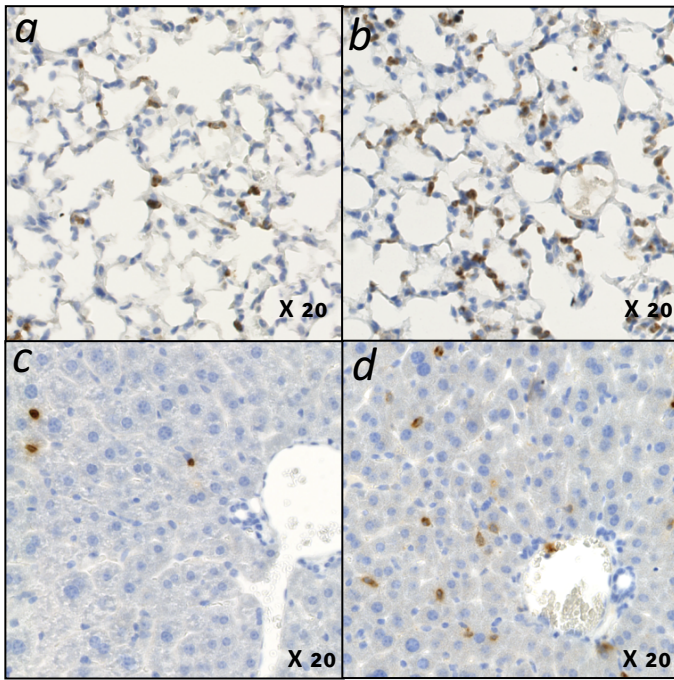

Sham

CLP

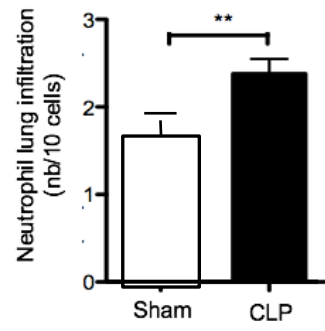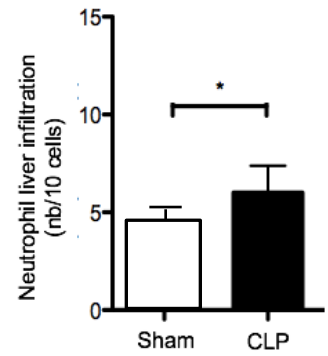

**b**

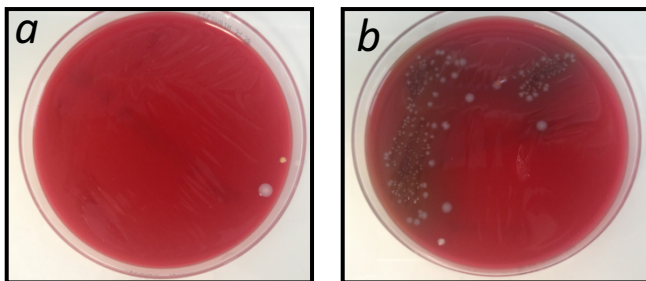

**a**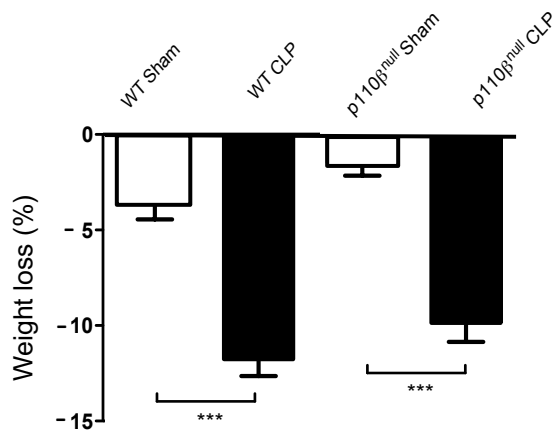**b**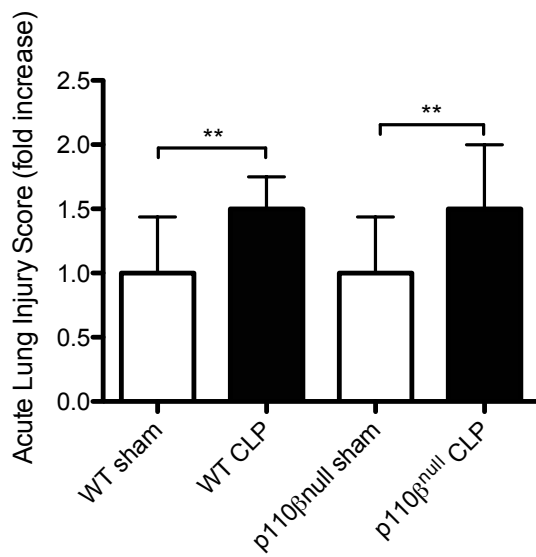

# Supplementary figures legends

**Supplementary Figure 1. Influence of sepsis on cytokines plasmatic levels serum creatinine level.** Comparison of plasma levels of (a) IL1 $\beta$ , (b) IL6 and (c) TNF $\alpha$  6 h post CLP. (d) Serum creatinine analysis was performed with a PENTRA 400 ABXc analyzer. Whisker boxes are presented as follows: min, max, median, 25-75th percentiles. Results are expressed as median  $\pm$  IQR of 10 independent experiments (\* $p$ <0.05, \*\*\* $p$ <0.001).

**Supplementary Figure 2. Influence of sepsis on leukocyte counts after the onset of the infection.** Comparison lymphocytes (a), monocytes (b) and neutrophils (c) kinetics counts in sham and CLP-operated mice. Results are expressed as G/L and are median  $\pm$  IQR of 6 to 30 independent experiments (\* $p$ <0.05, \*\* $p$ <0.01, \*\*\* $p$ <0.001).

**Supplementary Figure 3. Influence of sepsis on leukocyte infiltration and identification of bacteria from blood culture.** (a) Representative histological sections of lung (a,b) and liver (c,d) tissues 48 h post surgery. Sections from CLP (b, d) or sham-operated animals (a,c) as controls were stained with Masson's trichrome and neutrophils were specifically labeled with an anti-Ly6b antibody. Images (x20 magnification) and histograms shown are representative of 3 independent experiments (\*  $p$ <0.05, \*\*  $p$ <0.01). (b) Comparison of bacteria blood culture from sham (a) and CLP-operated (b) mice. Blood bacteria were cultured in Petri dishes with sheep blood and incubated for 48 h at 37°C in an aerobic atmosphere. Microbial identification was done using the Biomérieux Vitek® 2 system (Hazelwood, MO, USA), an automated microbiology system utilizing growth-based technology, using colorimetric reagent cards that are incubated with the microorganism and interpreted automatically. *Enterococcus faecalis*, a gram positive bacteria, and *citrobacter braakii*, a gram negative bacteria were identified.

**Supplementary Figure 4. Lack of PI3K $\beta$  in platelets does not affect weight loss and lung injury during sepsis.** (a) Weight loss was measured 48 h post procedure in the sham-operated or the CLP groups of wild type (WT) or platelet PI3K $\beta$ -deficient (p110 $\beta$ <sup>null</sup>) mice. Results are expressed as percentage of weight loss and are median  $\pm$  IQR (n=8 to 13, \*\*\* $p$ <0.001). (b) The Acute Lung Injury (ALI) Score was quantified as in figure 1H in the sham-operated or the CLP group of wild type (WT) or platelet PI3K $\beta$ -deficient (p110 $\beta$ <sup>null</sup>) mice. Histograms shown are representative of 4 independent experiments (\*\* $p$ <0.01).
